# Supplementary material for: Interprofessional collaboration among health professionals in cleft lip and palate treatment and care in the public health sector of South Africa
Source: Springer Nature journal article supplement (doi:10.1186/s12960-021-00566-3), 2021-02-27
Supplement: MOESM1 [file 18911032]

**Examining inter-professional collaboration among cleft lip and palate healthcare team members in the public health sector of South Africa**

**FOR OFFICIAL USE ONLY**

|                       |                            |                            |                            |                            |                            |                            |                            |                            |                            |                             |                             |                      |                      |                      |                      |                      |                      |
|-----------------------|----------------------------|----------------------------|----------------------------|----------------------------|----------------------------|----------------------------|----------------------------|----------------------------|----------------------------|-----------------------------|-----------------------------|----------------------|----------------------|----------------------|----------------------|----------------------|----------------------|
| 1. Participant number | <input type="text"/>       | <input type="text"/>       | <input type="text"/>       | <input type="text"/>       |                            |                            |                            |                            |                            |                             |                             |                      |                      |                      |                      |                      |                      |
| 2. Study site         | <input type="checkbox"/> 1 | <input type="checkbox"/> 2 | <input type="checkbox"/> 3 | <input type="checkbox"/> 4 | <input type="checkbox"/> 5 | <input type="checkbox"/> 6 | <input type="checkbox"/> 7 | <input type="checkbox"/> 8 | <input type="checkbox"/> 9 | <input type="checkbox"/> 10 | <input type="checkbox"/> 11 | <input type="text"/> | <input type="text"/> | <input type="text"/> | <input type="text"/> | <input type="text"/> | <input type="text"/> |
| 3. Date of interview  | DD/MM/YY                   |                            | <input type="text"/>       | <input type="text"/>       | <input type="text"/>       | <input type="text"/>       | <input type="text"/>       | <input type="text"/>       | <input type="text"/>       | <input type="text"/>        |                             |                      |                      |                      |                      |                      |                      |

**STATEMENT OF CONSENT**

I have been given an information sheet and I understand the objectives of the study.

I further understand that my responses will be kept confidential and that it is up me whether or not to complete this questionnaire.

It has been explained to me that even if I choose not to complete this questionnaire, I should still return the questionnaire to the researchers and indicate **No** in the space below.

My refusal to participate will in no way prejudice me.

I agree voluntarily to complete the questionnaire (**please tick**).  **Yes**

**No**

**SECTION 1 – BACKGROUND INFORMATION**

OFFICE  
USE  
ONLY

- 101. What is your gender?
  - Male (0)
  - Female (1)
  
- 102. What is your age in years?.....
  
- 103. Which of the following groups is your profession?
  - Geneticist/Genetic Counsellor(1)
  - Plastic Surgeon(2)
  - Orthodontist(3)
  - ENT Surgeon(4)
  - Maxillo-Facial Surgeon(5)
  - Paediatric Dentist(6)
  - Paediatric surgeon(7)
  - Speech therapist(8)
  - Other(9).....
  
- 104. Do you hold any formal qualification on CLP care?
  - No... 0
  - Yes... 1
  
- 105. Do you participate on continuous professional development courses?
  - No... 0
  - Yes... 1

**SECTION 2 – CARE EXPERTISE**

|      | <i>Inter-disciplinary care requires collaboration between health –care professionals and patients and their families and circle of care in order to identify and take advantage of each person’s care expertise. To support inter-disciplinary practice, practitioners are able to:</i> | Never (1) | Rarely (2) | Sometimes(3) | Always(4) | Does’nt apply (0) |
|------|-----------------------------------------------------------------------------------------------------------------------------------------------------------------------------------------------------------------------------------------------------------------------------------------|-----------|------------|--------------|-----------|-------------------|
| 201. | Support the participation of patients/clients, their families, and / or community representatives as integral partners alongside health-care personnel                                                                                                                                  |           |            |              |           |                   |
| 202. | Share information with patients/clients (or family and the community) in a respectful manner and in such a way that it is understandable, encourages discussion and enhances participation in decision making                                                                           |           |            |              |           |                   |
| 203. | Ensure that appropriate education and support is provided to patients/clients, family members and others involved with care or service                                                                                                                                                  |           |            |              |           |                   |
| 204. | Listen respectfully to the expressed needs of all parties in shaping and delivering care or services                                                                                                                                                                                    |           |            |              |           |                   |
| 205. | Conduct a collaborative inter-professional assessment to identify what expertise is required and then individualize for each patient/client                                                                                                                                             |           |            |              |           |                   |

|      |                                                                                                                     |  |  |  |  |  |
|------|---------------------------------------------------------------------------------------------------------------------|--|--|--|--|--|
| 206. | Coordinated effort to find the best expert for the patient/client                                                   |  |  |  |  |  |
| 207. | Patients/clients are full participants in their own care                                                            |  |  |  |  |  |
| 208. | Include specific contributions and collective knowledge as dictated by the complexity of the patients/clients needs |  |  |  |  |  |

**SECTION 3 – SHARED POWER**

|      |                                                                                                                                                                                                                                             |           |            |              |           |                    |
|------|---------------------------------------------------------------------------------------------------------------------------------------------------------------------------------------------------------------------------------------------|-----------|------------|--------------|-----------|--------------------|
|      | <i>Willingness to share power is a commitment to create balanced relationship through democratic practices of leadership, decision making, authority and responsibility. To support inter-personal practice, practitioners are able to:</i> | Never (1) | Rarely (2) | Sometimes(3) | Always(4) | Does not apply (0) |
| 301. | Leverage opportunities for all team members to contribute                                                                                                                                                                                   |           |            |              |           |                    |
| 302. | Create balanced power relationships                                                                                                                                                                                                         |           |            |              |           |                    |
| 303. | Establish a safe environment to express diverse opinions                                                                                                                                                                                    |           |            |              |           |                    |
| 304. | Consider points of view of all care providers                                                                                                                                                                                               |           |            |              |           |                    |

**SECTION 4 – COLLABORATIVE LEADERSHIP**

|      |                                                                                                                                                                                                                                                                                                                                                                         |           |            |              |           |                    |
|------|-------------------------------------------------------------------------------------------------------------------------------------------------------------------------------------------------------------------------------------------------------------------------------------------------------------------------------------------------------------------------|-----------|------------|--------------|-----------|--------------------|
|      | <i>Collaborative leadership (also called reciprocal or shared leadership) is a people – and relationship – focused approach based on the premise that answers should be found in the collective (the team). To support inter-disciplinary practice, practitioners collaboratively determine who will provide group leadership in any given situation by supporting:</i> | Never (1) | Rarely (2) | Sometimes(3) | Always(4) | Does not apply (0) |
| 401. | Work with others to enable effective patients/client outcomes                                                                                                                                                                                                                                                                                                           |           |            |              |           |                    |
| 402. | Advance interdependent working relationships among all participants                                                                                                                                                                                                                                                                                                     |           |            |              |           |                    |
| 403. | Facilitation of effective team processes                                                                                                                                                                                                                                                                                                                                |           |            |              |           |                    |
| 404. | Establish a climate for collaborative practice among all participants                                                                                                                                                                                                                                                                                                   |           |            |              |           |                    |
| 405. | Co-create a climate for shared leadership and collaborative practice                                                                                                                                                                                                                                                                                                    |           |            |              |           |                    |
| 406. | Apply collaborative decision making principles                                                                                                                                                                                                                                                                                                                          |           |            |              |           |                    |
| 407. | Integrate the principles of continuous quality improvement to work processes and outcomes                                                                                                                                                                                                                                                                               |           |            |              |           |                    |
| 408. | Share accountability that addresses power and hierarchy                                                                                                                                                                                                                                                                                                                 |           |            |              |           |                    |
| 409. | Utilize structures and processes to advance exemplary care                                                                                                                                                                                                                                                                                                              |           |            |              |           |                    |
| 410. | Work with others to enable effective patients/client outcomes                                                                                                                                                                                                                                                                                                           |           |            |              |           |                    |

**SECTION 5 – SHARED DECISION MAKING**

|      | <i>Shared decision-making gives all team members, including patients, the opportunity to contribute their knowledge and expertise, to arrive collaboratively at an optimal goal. To support inter-disciplinary practice, /practitioners are able to:</i> | Never (1) | Rarely (2) | Sometimes(3) | Always(4) | Does not apply (0) |
|------|----------------------------------------------------------------------------------------------------------------------------------------------------------------------------------------------------------------------------------------------------------|-----------|------------|--------------|-----------|--------------------|
| 501. | Recognize and respect each other’s knowledge and expertise, regardless of occupation and formal position                                                                                                                                                 |           |            |              |           |                    |
| 502. | Willing to accept responsibility for decisions                                                                                                                                                                                                           |           |            |              |           |                    |

**SECTION 6 – OPTIMIZING PROFESSION, ROLE AND SCOPE**

|      | <i>Exemplary inter-disciplinary care let all team members work to their full scope of practice and takes advantage of the synergies professionals working together can create. To support inter-disciplinary practice, practitioners are able to:</i> | Never (1) | Rarely (2) | Sometimes(3) | Always(4) | Does not apply (0) |
|------|-------------------------------------------------------------------------------------------------------------------------------------------------------------------------------------------------------------------------------------------------------|-----------|------------|--------------|-----------|--------------------|
| 601. | Describe their role and others’                                                                                                                                                                                                                       |           |            |              |           |                    |
| 602. | Recognize and respect the diversity of other health and social care roles, responsibilities, and competencies                                                                                                                                         |           |            |              |           |                    |
| 603. | Perform their own roles in a culturally respectful way                                                                                                                                                                                                |           |            |              |           |                    |
| 604. | Communicate roles, knowledge, skills, and attitudes using appropriate language                                                                                                                                                                        |           |            |              |           |                    |
| 605. | Consider the roles of others in determining own professional roles                                                                                                                                                                                    |           |            |              |           |                    |
| 606. | Access others’ skills and knowledge appropriately through consultation                                                                                                                                                                                |           |            |              |           |                    |
| 607. | Consider the roles of other in determining own professional and inter-professional roles                                                                                                                                                              |           |            |              |           |                    |
| 608. | Integrate competencies/roles seamlessly into models of service delivery                                                                                                                                                                               |           |            |              |           |                    |
| 609. | Demonstrate knowledge application of own profession/roles/scope                                                                                                                                                                                       |           |            |              |           |                    |
| 610. | Explore and integrate roles of others                                                                                                                                                                                                                 |           |            |              |           |                    |

**SECTION 7 – EFFECTIVE GROUP FUNCTION**

|      | <i>A health-care system that supports effective teamwork can improve the quality of patient care, enhance patient safety, and reduce workload issues that cause burnout among professionals. To support inter-disciplinary practice, practitioners are able to:</i> | Never (1) | Rarely (2) | Sometimes(3) | Always(4) | Does not apply (0) |
|------|---------------------------------------------------------------------------------------------------------------------------------------------------------------------------------------------------------------------------------------------------------------------|-----------|------------|--------------|-----------|--------------------|
| 701. | Understand the process of team development                                                                                                                                                                                                                          |           |            |              |           |                    |
| 702. | Develop a set of principles for working together that respects the ethical values of members                                                                                                                                                                        |           |            |              |           |                    |
| 703. | Effectively facilitate discussions and interactions among team members                                                                                                                                                                                              |           |            |              |           |                    |
| 704. | Participate, and be respectful of all members’ participating , in collaborative decision making                                                                                                                                                                     |           |            |              |           |                    |
| 705. | Regularly reflect on their functioning with team learners/practitioners and patients/clients families                                                                                                                                                               |           |            |              |           |                    |

|                                            |                                                                                                                                                                                                                                               |           |            |              |           |                    |
|--------------------------------------------|-----------------------------------------------------------------------------------------------------------------------------------------------------------------------------------------------------------------------------------------------|-----------|------------|--------------|-----------|--------------------|
| 706.                                       | Establish and maintains effective and healthy working relationships with learners/practitioners, patients/clients, and families, whether or not a formalized team exists                                                                      |           |            |              |           |                    |
| 707.                                       | Respect team ethics, including confidentiality, resource and allocation, and professionalism                                                                                                                                                  |           |            |              |           |                    |
| 708.                                       | Collaborate and engage together to formulate implement and evaluate care                                                                                                                                                                      |           |            |              |           |                    |
| 709.                                       | Assess, Practise and reflect upon effective group processes                                                                                                                                                                                   |           |            |              |           |                    |
| <b>SECTION 8 - COMPETENT COMMUNICATION</b> |                                                                                                                                                                                                                                               |           |            |              |           |                    |
|                                            | <i>Competent communication – openness, honesty, respect for each other’s opinions and effective communication skills – is a part of all domains of inter-disciplinary practice. To support inter-disciplinary, practitioners are able to:</i> | Never (1) | Rarely (2) | Sometimes(3) | Always(4) | Does not apply (0) |
| 801.                                       | Establish team work communication principles                                                                                                                                                                                                  |           |            |              |           |                    |
| 802.                                       | Actively listen to other team members including patients/ clients/families                                                                                                                                                                    |           |            |              |           |                    |
| 803.                                       | Communicate to ensure common understanding of care decisions                                                                                                                                                                                  |           |            |              |           |                    |
| 804.                                       | Develop trusting relationships with patients/clients/families and team members                                                                                                                                                                |           |            |              |           |                    |
| 805.                                       | Effectively use information and communication technology to improve inter-professional patient/client/community-centered care                                                                                                                 |           |            |              |           |                    |
| 806.                                       | Is clear, focused, transparent and respectful                                                                                                                                                                                                 |           |            |              |           |                    |
| 807.                                       | Constructively manages conflict                                                                                                                                                                                                               |           |            |              |           |                    |
| 808.                                       | Maintains and enhances the relationship                                                                                                                                                                                                       |           |            |              |           |                    |

Thank you for participating
