# Supplementary material for: Interprofessional collaboration among health professionals in cleft lip and palate treatment and care in the public health sector of South Africa
Source: Springer Nature journal article supplement (doi:10.1186/s12960-021-00566-3), 2021-02-27
Supplement: MOESM2 [file 18911032]

| Study site | gender | age | profession | Doctor    |
|------------|--------|-----|------------|-----------|
| 2          | 1      | 30  |            | 7 Peads   |
| 2          | 1      | 35  |            | 9         |
| 2          | 0      | 50  |            | 1         |
| 2          | 1      | 42  |            | 2 Plastic |
| 2          | 0      | 55  |            | 2 Plastic |
| 9          | 0      | 36  |            | 2 Plastic |
| 9          | 0      | 56  |            | 2 Plastic |
| 11         | 1      | 33  |            | 2 Plastic |
| 11         | 0      | 56  |            | 2 Plastic |
| 11         | 0      | 51  |            | 7 Paed    |
| 3          | 0      | 35  |            | 2 Plastic |
| 3          | 0      | 42  |            | 2 Plastic |
| 3          | 0      | 37  |            | 2 Plastic |
| 4          | 1      | 27  |            | 8         |
| 4          | 1      | 22  |            | 8         |
| 4          | 1      | 24  |            | 8         |
| 4          | 1      | 29  |            | 8         |
| 4          | 1      | 26  |            | 8         |
| 7          | 0      | 48  |            | 2 Plastic |
| 7          | 1      | 59  |            | 9         |
| 7          | 1      | 72  |            | 10        |
| 7          | 1      | 59  |            | 8         |
| 7          | 0      | 37  |            | 2 Plastic |
| 7          | 1      | 56  |            | 3 ortho   |
| 6          | 0      | 50  |            | 2 Plastic |
| 6          | 1      | 42  |            | 2 Plastic |
| 6          | 0      | 52  |            | 2 Plastic |
| 6          | 1      | 27  |            | 8         |
| 6          | 0      | 32  |            | 2 Plastic |
| 6          | 0      | 59  |            | 5 mfos    |
| 8          | 0      | 58  |            | 2 Plastic |
| 8          | 0      | 25  |            | 6 dentist |
| 8          | 1      | 37  |            | 1         |
| 8          | 0      | 40  |            | 5 mfos    |
| 8          | 1      | 36  |            | 2 Plastic |
| 10         | 1      | 34  |            | 2 Plastic |
| 10         | 0      | 40  |            | 2 Plastic |
| 10         | 0      | 62  |            | 2 Plastic |
| 10         | 0      | 32  |            | 2 Plastic |
| 10         | 1      | 26  |            | 8         |
| 5          | 1      | 48  |            | 10        |
| 5          | 1      | 31  |            | 8         |
| 5          | 1      | 34  |            | 8         |
| 5          | 0      | 44  |            | 10        |
| 5          | 0      | 54  |            | 3 ortho   |
| 5          | 1      | 59  |            | 10        |
| 5          | 1      | 64  |            | 10        |
| 5          | 0      | 46  |            | 5 mfos    |
| 1          | 1      | 24  |            | 8         |

|   |   |    |           |
|---|---|----|-----------|
| 1 | 0 | 42 | 8         |
| 1 | 1 | 31 | 2 Plastic |
| 1 | 1 | 30 | 11        |

| OTHER            | clp qualification | cpd | 201 | 202 | 203 |   |
|------------------|-------------------|-----|-----|-----|-----|---|
|                  |                   | 0   | 1   | 2   | 2   | 2 |
| Psychologist     |                   | 0   | 1   | 2   | 2   | 2 |
| Geneticist       |                   | 0   | 1   | 2   | 2   | 2 |
|                  |                   | 0   | 1   | 2   | 2   | 2 |
|                  |                   | 0   | 1   | 2   | 2   | 2 |
|                  |                   | 0   | 1   | 2   | 2   | 2 |
|                  |                   | 0   | 1   | 2   | 2   | 2 |
|                  |                   | 0   | 1   | 3   | 3   | 3 |
|                  |                   | 0   | 1   | 3   | 3   | 3 |
|                  |                   | 0   | 1   | 2   | 3   | 3 |
|                  |                   | 0   | 0   | 2   | 3   | 3 |
|                  |                   | 0   | 1   | 2   | 3   | 3 |
|                  |                   | 0   | 1   | 3   | 3   | 3 |
| Speech therapist |                   | 0   | 1   | 3   | 3   | 3 |
| Speech therapist |                   | 0   | 1   | 3   | 3   | 3 |
| Speech therapist |                   | 0   | 1   | 2   | 3   | 3 |
| Speech therapist |                   | 0   | 1   | 3   | 3   | 3 |
| Speech therapist |                   | 0   | 1   | 3   | 3   | 3 |
|                  |                   | 0   | 1   | 2   | 3   | 3 |
| Psychologist     |                   | 0   | 1   | 2   | 3   | 3 |
| Nurse            |                   | 0   | 0   | 2   | 1   | 2 |
| Speech therapist |                   | 0   | 1   | 3   | 3   | 3 |
|                  |                   | 0   | 1   | 3   | 2   | 3 |
|                  |                   | 0   | 1   | 3   | 3   | 3 |
|                  |                   | 0   | 1   | 3   | 3   | 3 |
|                  |                   | 0   | 1   | 3   | 3   | 3 |
|                  |                   | 0   | 1   | 3   | 3   | 3 |
| Speech therapist |                   | 0   | 1   | 3   | 3   | 3 |
|                  |                   | 0   | 1   | 2   | 3   | 3 |
|                  |                   | 0   | 1   | 2   | 3   | 3 |
|                  |                   | 0   | 1   | 3   | 3   | 3 |
|                  |                   | 0   | 1   | 3   | 3   | 3 |
| Geneticist       |                   | 0   | 1   | 3   | 3   | 3 |
|                  |                   | 0   | 1   | 3   | 3   | 3 |
|                  |                   | 0   | 1   | 3   | 3   | 3 |
|                  |                   | 0   | 1   | 3   | 3   | 2 |
|                  |                   | 0   | 1   | 3   | 3   | 3 |
|                  |                   | 0   | 1   | 3   | 3   | 3 |
|                  |                   | 0   | 1   | 3   | 3   | 3 |
| Speech therapist |                   | 0   | 1   | 2   | 3   | 3 |
| Nurse            |                   | 0   | 0   | 2   | 3   | 2 |
| Speech therapist |                   | 0   | 1   | 3   | 2   | 2 |
| Speech therapist |                   | 0   | 1   | 3   | 3   | 3 |
| Nurse            |                   | 0   | 0   | 3   | 3   | 3 |
|                  |                   | 0   | 1   | 3   | 3   | 3 |
| Nurse            |                   | 0   | 1   | 3   | 3   | 2 |
| Nurse            |                   | 0   | 1   | 3   | 3   | 3 |
|                  |                   | 0   | 1   | 3   | 3   | 3 |
| Speech therapist |                   | 0   | 1   | 2   | 2   | 3 |

|                  |   |   |   |   |   |
|------------------|---|---|---|---|---|
| Speech therapist | 0 | 1 | 3 | 3 | 3 |
|                  | 0 | 1 | 3 | 3 | 3 |
| Social worker    | 0 | 1 | 2 | 2 | 3 |

| 204 | 205 | 206 | 207 | 208 | 301 | 302 | 303 | 304 | 401 |
|-----|-----|-----|-----|-----|-----|-----|-----|-----|-----|
| 2   | 2   | 2   | 1   | 2   | 3   | 2   | 3   | 3   | 3   |
| 2   | 2   | 2   | 1   | 2   | 3   | 2   | 3   | 3   | 3   |
| 2   | 2   | 2   | 1   | 2   | 3   | 2   | 3   | 3   | 3   |
| 2   | 2   | 2   | 1   | 2   | 3   | 2   | 3   | 3   | 3   |
| 2   | 2   | 2   | 1   | 2   | 3   | 2   | 3   | 3   | 3   |
| 2   | 2   | 2   | 1   | 2   | 3   | 2   | 3   | 3   | 3   |
| 2   | 2   | 2   | 1   | 2   | 3   | 2   | 3   | 3   | 3   |
| 3   | 3   | 3   | 3   | 3   | 3   | 3   | 3   | 3   | 3   |
| 3   | 2   | 3   | 2   | 2   | 3   | 2   | 3   | 3   | 3   |
| 2   | 3   | 3   | 2   | 2   | 2   | 1   | 3   | 2   | 2   |
| 3   | 2   | 2   | 2   | 3   | 3   | 2   | 3   | 3   | 2   |
| 3   | 2   | 2   | 2   | 3   | 3   | 2   | 3   | 3   | 2   |
| 3   | 3   | 3   | 3   | 3   | 3   | 3   | 3   | 3   | 3   |
| 3   | 2   | 2   | 3   | 3   | 2   | 2   | 3   | 3   | 2   |
| 3   | 3   | 3   | 2   | 3   | 2   | 2   | 2   | 2   | 3   |
| 3   | 1   | 2   | 3   | 2   | 1   | 1   | 0   | 1   | 2   |
| 3   | 1   | 2   | 1   | 2   | 2   | 2   | 1   | 2   | 3   |
| 3   | 2   | 2   | 3   | 3   | 2   | 2   | 3   | 3   | 3   |
| 3   | 3   | 3   | 2   | 3   | 2   | 2   | 2   | 2   | 3   |
| 3   | 1   | 2   | 2   | 2   | 3   | 2   | 3   | 2   | 3   |
| 3   | 3   | 3   | 3   | 3   | 2   | 3   | 3   | 2   | 3   |
| 3   | 3   | 3   | 3   | 3   | 3   | 3   | 3   | 3   | 3   |
| 3   | 2   | 2   | 2   | 3   | 2   | 3   | 2   | 3   | 2   |
| 3   | 3   | 3   | 2   | 2   | 3   | 3   | 3   | 3   | 3   |
| 3   | 3   | 3   | 3   | 3   | 3   | 3   | 3   | 3   | 3   |
| 3   | 3   | 3   | 2   | 3   | 3   | 2   | 3   | 3   | 3   |
| 2   | 2   | 2   | 3   | 3   | 3   | 2   | 3   | 3   | 3   |
| 3   | 3   | 3   | 3   | 3   | 2   | 2   | 3   | 3   | 3   |
| 3   | 3   | 3   | 2   | 3   | 3   | 2   | 3   | 3   | 3   |
| 3   | 3   | 3   | 2   | 3   | 3   | 2   | 3   | 3   | 3   |
| 3   | 3   | 3   | 3   | 3   | 3   | 3   | 3   | 3   | 3   |
| 3   | 3   | 3   | 3   | 3   | 3   | 3   | 3   | 3   | 3   |
| 3   | 3   | 3   | 3   | 3   | 3   | 3   | 3   | 3   | 3   |
| 3   | 3   | 3   | 3   | 3   | 3   | 3   | 3   | 3   | 3   |
| 3   | 3   | 3   | 3   | 3   | 3   | 3   | 3   | 3   | 3   |
| 3   | 3   | 3   | 3   | 3   | 3   | 2   | 3   | 3   | 3   |
| 3   | 3   | 3   | 3   | 3   | 3   | 3   | 2   | 3   | 3   |
| 3   | 3   | 3   | 2   | 3   | 3   | 3   | 3   | 3   | 3   |
| 3   | 3   | 3   | 2   | 3   | 3   | 3   | 3   | 3   | 3   |
| 3   | 3   | 3   | 2   | 3   | 3   | 3   | 3   | 3   | 3   |
| 3   | 2   | 3   | 3   | 3   | 3   | 3   | 2   | 2   | 3   |
| 3   | 2   | 3   | 3   | 2   | 0   | 1   | 2   | 0   | 1   |
| 3   | 2   | 2   | 2   | 2   | 2   | 2   | 2   | 2   | 2   |
| 3   | 3   | 3   | 3   | 3   | 3   | 3   | 3   | 3   | 3   |
| 3   | 3   | 3   | 3   | 2   | 2   | 2   | 3   | 2   | 3   |
| 3   | 3   | 3   | 3   | 3   | 3   | 3   | 3   | 3   | 3   |
| 3   | 3   | 3   | 2   | 2   | 3   | 3   | 3   | 3   | 3   |
| 3   | 3   | 3   | 3   | 3   | 3   | 3   | 3   | 3   | 3   |
| 3   | 3   | 3   | 3   | 3   | 3   | 3   | 3   | 3   | 3   |
| 3   | 3   | 3   | 3   | 3   | 3   | 3   | 3   | 3   | 3   |
| 3   | 2   | 3   | 2   | 2   | 3   | 3   | 3   | 3   | 3   |

|   |   |   |   |   |   |   |   |   |   |
|---|---|---|---|---|---|---|---|---|---|
| 3 | 3 | 3 | 3 | 3 | 3 | 3 | 3 | 3 | 3 |
| 3 | 3 | 3 | 3 | 3 | 3 | 3 | 3 | 3 | 3 |
| 3 | 2 | 3 | 2 | 2 | 3 | 3 | 3 | 3 | 3 |

| 402 | 403 | 404 | 405 | 406 | 407 | 408 | 409 | 410 |
|-----|-----|-----|-----|-----|-----|-----|-----|-----|
| 2   | 2   | 3   | 3   | 2   | 2   | 2   | 3   | 2   |
| 2   | 2   | 3   | 3   | 2   | 2   | 2   | 3   | 2   |
| 2   | 2   | 3   | 3   | 2   | 2   | 2   | 3   | 2   |
| 2   | 2   | 3   | 3   | 2   | 2   | 2   | 3   | 2   |
| 2   | 2   | 3   | 3   | 2   | 2   | 2   | 3   | 2   |
| 2   | 2   | 3   | 3   | 2   | 2   | 2   | 3   | 2   |
| 2   | 2   | 3   | 3   | 2   | 2   | 2   | 3   | 2   |
| 3   | 3   | 3   | 3   | 3   | 3   | 3   | 3   | 3   |
| 3   | 3   | 3   | 2   | 2   | 3   | 3   | 3   | 3   |
| 3   | 3   | 2   | 1   | 2   | 3   | 2   | 2   | 3   |
| 2   | 3   | 3   | 2   | 2   | 3   | 3   | 3   | 2   |
| 3   | 3   | 3   | 2   | 2   | 3   | 3   | 3   | 2   |
| 3   | 3   | 2   | 3   | 2   | 3   | 2   | 3   | 3   |
| 3   | 3   | 3   | 3   | 3   | 2   | 3   | 3   | 3   |
| 2   | 3   | 2   | 2   | 2   | 3   | 2   | 2   | 3   |
| 2   | 1   | 1   | 1   | 1   | 2   | 1   | 1   | 1   |
| 2   | 2   | 2   | 2   | 2   | 2   | 1   | 2   | 2   |
| 3   | 3   | 3   | 3   | 3   | 3   | 3   | 3   | 3   |
| 3   | 3   | 3   | 3   | 2   | 2   | 3   | 3   | 3   |
| 3   | 2   | 2   | 2   | 1   | 2   | 1   | 2   | 3   |
| 3   | 2   | 3   | 2   | 2   | 3   | 2   | 3   | 3   |
| 3   | 3   | 3   | 3   | 3   | 3   | 3   | 3   | 3   |
| 2   | 2   | 3   | 2   | 2   | 3   | 2   | 2   | 3   |
| 3   | 3   | 3   | 3   | 3   | 3   | 3   | 3   | 3   |
| 3   | 3   | 3   | 3   | 3   | 3   | 3   | 3   | 3   |
| 3   | 3   | 3   | 2   | 2   | 2   | 2   | 3   | 3   |
| 3   | 3   | 2   | 2   | 2   | 2   | 2   | 3   | 3   |
| 2   | 2   | 3   | 3   | 3   | 3   | 3   | 3   | 3   |
| 3   | 3   | 3   | 2   | 3   | 3   | 3   | 3   | 2   |
| 3   | 3   | 3   | 2   | 3   | 3   | 3   | 3   | 2   |
| 3   | 3   | 3   | 3   | 3   | 3   | 3   | 3   | 3   |
| 3   | 3   | 3   | 3   | 3   | 3   | 3   | 3   | 3   |
| 3   | 3   | 3   | 3   | 3   | 3   | 3   | 3   | 3   |
| 3   | 3   | 3   | 3   | 3   | 3   | 3   | 3   | 3   |
| 3   | 3   | 3   | 3   | 3   | 3   | 3   | 3   | 3   |
| 3   | 3   | 3   | 3   | 3   | 3   | 3   | 3   | 3   |
| 3   | 3   | 3   | 3   | 3   | 3   | 3   | 3   | 3   |
| 3   | 3   | 3   | 3   | 3   | 3   | 3   | 3   | 3   |
| 3   | 3   | 3   | 3   | 3   | 3   | 3   | 3   | 3   |
| 3   | 3   | 3   | 3   | 3   | 3   | 3   | 3   | 3   |
| 3   | 3   | 3   | 3   | 3   | 3   | 3   | 3   | 3   |
| 3   | 3   | 3   | 3   | 3   | 3   | 3   | 3   | 3   |
| 3   | 3   | 3   | 3   | 3   | 3   | 3   | 3   | 3   |
| 3   | 3   | 3   | 3   | 3   | 3   | 3   | 3   | 3   |
| 2   | 3   | 2   | 2   | 2   | 3   | 2   | 3   | 3   |
| 1   | 1   | 1   | 2   | 2   | 2   | 0   | 2   | 2   |
| 2   | 2   | 2   | 2   | 2   | 2   | 2   | 2   | 2   |
| 3   | 3   | 3   | 3   | 3   | 3   | 3   | 3   | 3   |
| 3   | 3   | 3   | 2   | 2   | 3   | 3   | 2   | 3   |
| 3   | 3   | 3   | 3   | 3   | 3   | 3   | 3   | 3   |
| 3   | 3   | 3   | 3   | 3   | 3   | 3   | 3   | 3   |
| 3   | 3   | 3   | 3   | 3   | 3   | 3   | 3   | 3   |
| 3   | 3   | 3   | 2   | 2   | 3   | 3   | 2   | 3   |
| 3   | 3   | 3   | 3   | 3   | 3   | 3   | 3   | 3   |
| 3   | 3   | 3   | 2   | 2   | 3   | 3   | 3   | 3   |
| 3   | 2   | 2   | 2   | 2   | 1   | 1   | 1   | 2   |

|   |   |   |   |   |   |   |   |   |
|---|---|---|---|---|---|---|---|---|
| 3 | 3 | 3 | 3 | 3 | 3 | 3 | 3 | 3 |
| 3 | 3 | 3 | 3 | 3 | 3 | 3 | 3 | 3 |
| 3 | 3 | 2 | 2 | 2 | 2 | 1 | 1 | 2 |



| 501 | 502 | 601 | 602 | 603 | 604 | 605 | 606 | 607 |
|-----|-----|-----|-----|-----|-----|-----|-----|-----|
| 2   | 3   | 3   | 3   | 3   | 3   | 2   | 3   | 2   |
| 2   | 3   | 3   | 3   | 3   | 3   | 2   | 3   | 2   |
| 2   | 3   | 3   | 3   | 3   | 3   | 2   | 3   | 2   |
| 2   | 3   | 3   | 3   | 3   | 3   | 2   | 3   | 2   |
| 2   | 3   | 3   | 3   | 3   | 3   | 2   | 3   | 2   |
| 2   | 3   | 3   | 3   | 3   | 3   | 2   | 3   | 2   |
| 2   | 3   | 3   | 3   | 3   | 3   | 2   | 3   | 2   |
| 3   | 3   | 3   | 3   | 3   | 3   | 3   | 3   | 3   |
| 3   | 3   | 3   | 3   | 3   | 3   | 3   | 3   | 3   |
| 2   | 2   | 3   | 2   | 1   | 3   | 3   | 3   | 2   |
| 3   | 3   | 2   | 3   | 3   | 3   | 2   | 3   | 4   |
| 3   | 3   | 2   | 3   | 3   | 3   | 2   | 3   | 4   |
| 2   | 3   | 3   | 3   | 2   | 3   | 2   | 3   | 3   |
| 3   | 3   | 3   | 3   | 3   | 3   | 3   | 3   | 3   |
| 3   | 3   | 3   | 3   | 2   | 2   | 3   | 3   | 3   |
| 3   | 3   | 3   | 3   | 3   | 3   | 3   | 2   | 2   |
| 2   | 2   | 3   | 3   | 3   | 2   | 2   | 1   | 2   |
| 3   | 3   | 3   | 3   | 3   | 3   | 3   | 3   | 3   |
| 2   | 2   | 2   | 2   | 2   | 3   | 3   | 3   | 3   |
| 3   | 3   | 3   | 3   | 2   | 2   | 3   | 2   | 3   |
| 3   | 3   | 3   | 3   | 3   | 3   | 3   | 3   | 3   |
| 3   | 3   | 3   | 3   | 3   | 3   | 3   | 3   | 3   |
| 3   | 2   | 2   | 2   | 2   | 3   | 2   | 2   | 3   |
| 3   | 3   | 3   | 3   | 3   | 3   | 3   | 3   | 3   |
| 3   | 3   | 3   | 3   | 3   | 3   | 3   | 3   | 3   |
| 3   | 3   | 3   | 3   | 3   | 3   | 3   | 3   | 3   |
| 3   | 3   | 3   | 3   | 2   | 2   | 3   | 3   | 3   |
| 3   | 3   | 3   | 3   | 3   | 3   | 2   | 3   | 2   |
| 3   | 3   | 3   | 3   | 3   | 2   | 2   | 3   | 2   |
| 2   | 2   | 2   | 2   | 2   | 2   | 2   | 2   | 2   |
| 2   | 2   | 2   | 2   | 2   | 2   | 2   | 2   | 2   |
| 3   | 3   | 3   | 3   | 3   | 3   | 3   | 3   | 3   |
| 3   | 3   | 3   | 3   | 3   | 3   | 3   | 3   | 3   |
| 3   | 3   | 3   | 3   | 3   | 3   | 3   | 3   | 3   |
| 3   | 3   | 3   | 3   | 3   | 3   | 3   | 3   | 3   |
| 3   | 3   | 3   | 3   | 3   | 3   | 3   | 3   | 3   |
| 2   | 2   | 3   | 3   | 2   | 2   | 3   | 3   | 3   |
| 3   | 3   | 3   | 3   | 3   | 3   | 3   | 3   | 3   |
| 3   | 3   | 3   | 3   | 3   | 3   | 3   | 3   | 3   |
| 3   | 3   | 3   | 3   | 2   | 2   | 3   | 3   | 3   |
| 3   | 3   | 3   | 3   | 3   | 2   | 3   | 3   | 2   |
| 0   | 1   | 1   | 0   | 0   | 1   | 1   | 0   | 1   |
| 2   | 2   | 2   | 2   | 2   | 2   | 2   | 2   | 2   |
| 3   | 3   | 3   | 3   | 3   | 3   | 3   | 3   | 3   |
| 3   | 2   | 1   | 3   | 3   | 3   | 3   | 3   | 3   |
| 3   | 3   | 3   | 3   | 3   | 3   | 3   | 3   | 3   |
| 3   | 3   | 3   | 3   | 3   | 3   | 3   | 3   | 3   |
| 3   | 2   | 3   | 3   | 3   | 2   | 3   | 3   | 3   |
| 3   | 3   | 3   | 3   | 3   | 3   | 3   | 3   | 3   |
| 2   | 3   | 2   | 2   | 2   | 1   | 1   | 2   | 2   |

|   |   |   |   |   |   |   |   |   |
|---|---|---|---|---|---|---|---|---|
| 3 | 3 | 2 | 3 | 3 | 3 | 3 | 3 | 3 |
| 3 | 3 | 3 | 3 | 3 | 3 | 3 | 3 | 3 |
| 2 | 2 | 2 | 2 | 2 | 1 | 1 | 2 | 2 |

| 608 | 609 | 610 | 701 | 702 | 703 | 704 | 705 | 706 | 707 |
|-----|-----|-----|-----|-----|-----|-----|-----|-----|-----|
| 3   | 3   | 3   | 2   | 3   | 3   | 3   | 2   | 2   | 2   |
| 3   | 3   | 3   | 2   | 3   | 3   | 3   | 2   | 2   | 2   |
| 3   | 3   | 3   | 2   | 3   | 3   | 3   | 2   | 2   | 2   |
| 3   | 3   | 3   | 2   | 3   | 3   | 3   | 2   | 2   | 2   |
| 3   | 3   | 3   | 2   | 3   | 3   | 3   | 2   | 2   | 2   |
| 3   | 3   | 3   | 2   | 3   | 3   | 3   | 2   | 2   | 2   |
| 3   | 3   | 3   | 3   | 3   | 3   | 3   | 3   | 3   | 3   |
| 2   | 3   | 3   | 3   | 2   | 3   | 3   | 2   | 2   | 3   |
| 2   | 3   | 1   | 3   | 1   | 3   | 3   | 1   | 1   | 2   |
| 3   | 2   | 2   | 2   | 3   | 3   | 3   | 3   | 2   | 3   |
| 3   | 2   | 2   |     | 3   | 3   | 3   | 3   | 2   | 3   |
| 3   | 3   | 3   | 3   | 3   | 3   | 3   | 3   | 2   | 3   |
| 3   | 3   | 3   | 3   | 3   | 3   | 3   | 3   | 3   | 3   |
| 2   | 3   | 2   | 2   | 3   | 2   | 3   | 2   | 3   | 2   |
| 2   | 2   | 2   | 3   | 3   | 1   | 2   | 2   | 3   | 3   |
| 2   | 3   | 2   | 2   | 1   | 2   | 2   | 1   | 2   | 2   |
| 3   | 3   | 3   | 3   | 3   | 3   | 3   | 3   | 3   | 3   |
| 3   | 3   | 3   | 3   | 2   | 3   | 2   | 2   | 1   | 3   |
| 2   | 2   | 2   | 1   | 2   | 1   | 3   | 1   | 2   | 2   |
| 3   | 3   | 2   | 3   | 3   | 3   | 3   | 3   | 3   | 3   |
| 3   | 3   | 3   | 3   | 3   | 2   | 2   | 2   | 3   | 3   |
| 3   | 3   | 3   | 2   | 2   | 2   | 2   | 2   | 2   | 3   |
| 3   | 3   | 2   | 3   | 3   | 3   | 3   | 3   | 3   | 3   |
| 3   | 3   | 3   | 3   | 3   | 3   | 3   | 3   | 3   | 3   |
| 3   | 3   | 3   | 3   | 3   | 3   | 3   | 3   | 3   | 3   |
| 3   | 3   | 3   | 3   | 3   | 3   | 3   | 1   | 3   | 2   |
| 3   | 3   | 2   | 2   | 3   | 3   | 3   | 2   | 3   | 3   |
| 2   | 2   | 3   | 2   | 1   | 2   | 2   | 1   | 3   | 3   |
| 2   | 2   | 2   | 2   | 2   | 2   | 2   | 2   | 3   | 3   |
| 2   | 2   | 2   | 2   | 2   | 2   | 2   | 2   | 3   | 3   |
| 3   | 3   | 3   | 3   | 3   | 3   | 3   | 3   | 3   | 3   |
| 3   | 3   | 3   | 3   | 3   | 3   | 3   | 3   | 3   | 3   |
| 3   | 3   | 3   | 3   | 3   | 3   | 3   | 3   | 3   | 3   |
| 3   | 3   | 3   | 3   | 3   | 3   | 3   | 3   | 3   | 3   |
| 3   | 3   | 3   | 3   | 3   | 3   | 3   | 3   | 3   | 3   |
| 3   | 3   | 3   | 3   | 3   | 3   | 3   | 3   | 3   | 3   |
| 3   | 3   | 3   | 3   | 2   | 3   | 2   | 2   | 2   | 3   |
| 3   | 3   | 3   | 3   | 3   | 3   | 3   | 3   | 3   | 3   |
| 3   | 3   | 3   | 3   | 3   | 3   | 3   | 3   | 3   | 3   |
| 3   | 3   | 3   | 3   | 3   | 3   | 3   | 3   | 3   | 3   |
| 3   | 3   | 3   | 3   | 3   | 3   | 3   | 3   | 3   | 3   |
| 2   | 3   | 3   | 3   | 3   | 3   | 3   | 2   | 2   | 3   |
| 1   | 2   | 2   | 2   | 1   | 0   | 0   | 1   | 2   | 3   |
| 2   | 2   | 2   | 2   | 2   | 2   | 2   | 2   | 2   | 2   |
| 3   | 3   | 3   | 3   | 3   | 3   | 3   | 3   | 3   | 3   |
| 4   | 3   | 3   | 3   | 3   | 3   | 2   | 3   | 3   | 3   |
| 3   | 3   | 3   | 3   | 3   | 3   | 3   | 3   | 3   | 3   |
| 3   | 3   | 3   | 3   | 3   | 3   | 3   | 3   | 3   | 3   |
| 3   | 3   | 3   | 3   | 3   | 2   | 3   | 3   | 3   | 3   |
| 3   | 3   | 3   | 3   | 3   | 3   | 3   | 3   | 3   | 3   |
| 1   | 2   | 2   | 2   | 1   | 2   | 2   | 1   | 2   | 2   |



| 708 | 709 | 801 | 802 | 803 | 804 | 805 | 806 | 807 | 808 |
|-----|-----|-----|-----|-----|-----|-----|-----|-----|-----|
| 2   | 2   | 2   | 3   | 2   | 1   | 1   | 3   | 3   | 2   |
| 2   | 2   | 2   | 3   | 2   | 1   | 1   | 3   | 3   | 2   |
| 2   | 2   | 2   | 3   | 2   | 1   | 1   | 3   | 3   | 2   |
| 2   | 2   | 2   | 3   | 2   | 1   | 1   | 3   | 3   | 2   |
| 2   | 2   | 2   | 3   | 2   | 1   | 1   | 3   | 3   | 2   |
| 2   | 2   | 2   | 3   | 2   | 1   | 1   | 3   | 3   | 2   |
| 2   | 2   | 2   | 3   | 2   | 1   | 1   | 3   | 3   | 2   |
| 3   | 3   | 3   | 3   | 3   | 3   | 3   | 3   | 3   | 3   |
| 2   | 2   | 2   | 3   | 3   | 3   | 2   | 3   | 2   | 2   |
| 2   | 1   | 2   | 3   | 3   | 2   | 2   | 3   | 2   | 3   |
| 3   | 3   | 3   | 3   | 3   | 3   | 2   | 3   | 3   | 3   |
| 3   | 3   | 3   | 3   | 3   | 3   | 2   | 3   | 3   | 3   |
| 3   | 3   | 3   | 4   | 3   | 4   | 3   | 3   | 3   | 3   |
| 3   | 3   | 3   | 3   | 3   | 3   | 3   | 3   | 3   | 3   |
| 2   | 1   | 1   | 3   | 2   | 3   | 3   | 3   | 3   | 3   |
| 1   | 1   | 2   | 2   | 2   | 3   | 3   | 3   | 3   | 2   |
| 1   | 1   | 2   | 2   | 2   | 2   | 1   | 3   | 2   | 2   |
| 3   | 3   | 3   | 3   | 3   | 3   | 3   | 3   | 3   | 3   |
| 3   | 3   | 2   | 2   | 3   | 2   | 2   | 2   | 2   | 2   |
| 1   | 1   | 1   | 1   | 1   | 3   | 1   | 2   | 1   | 2   |
| 3   | 3   | 3   | 3   | 3   | 3   | 3   | 3   | 3   | 3   |
| 3   | 2   | 2   | 2   | 3   | 3   | 3   | 2   | 2   | 3   |
| 2   | 2   | 3   | 3   | 3   | 3   | 2   | 2   | 3   | 3   |
| 3   | 3   | 3   | 3   | 3   | 3   | 3   | 3   | 3   | 3   |
| 3   | 3   | 3   | 3   | 3   | 3   | 3   | 3   | 3   | 3   |
| 3   | 1   | 3   | 3   | 3   | 3   | 3   | 3   | 3   | 3   |
| 3   | 2   | 3   | 3   | 3   | 3   | 2   | 2   | 3   | 3   |
| 2   | 1   | 2   | 3   | 3   | 3   | 3   | 2   | 3   | 2   |
| 2   | 2   | 2   | 2   | 3   | 2   | 2   | 2   | 2   | 2   |
| 2   | 2   | 2   | 2   | 3   | 2   | 2   | 2   | 2   | 2   |
| 3   | 3   | 3   | 3   | 3   | 3   | 3   | 3   | 3   | 3   |
| 3   | 3   | 3   | 3   | 3   | 3   | 3   | 3   | 3   | 3   |
| 3   | 3   | 3   | 3   | 3   | 3   | 3   | 3   | 3   | 3   |
| 3   | 3   | 3   | 3   | 3   | 3   | 3   | 3   | 3   | 3   |
| 3   | 3   | 3   | 3   | 3   | 3   | 3   | 3   | 3   | 3   |
| 3   | 2   | 2   | 3   | 3   | 3   | 3   | 3   | 2   | 3   |
| 3   | 3   | 3   | 3   | 3   | 3   | 3   | 3   | 3   | 3   |
| 3   | 3   | 3   | 3   | 3   | 3   | 3   | 3   | 3   | 3   |
| 3   | 3   | 3   | 3   | 3   | 3   | 3   | 3   | 3   | 3   |
| 3   | 3   | 3   | 3   | 3   | 3   | 3   | 3   | 3   | 3   |
| 3   | 2   | 3   | 3   | 2   | 3   | 3   | 3   | 3   | 3   |
| 2   | 1   | 2   | 1   | 2   | 3   | 3   | 2   | 1   | 2   |
| 2   | 2   | 2   | 2   | 2   | 2   | 2   | 2   | 2   | 2   |
| 3   | 3   | 3   | 3   | 2   | 3   | 2   | 3   | 3   | 3   |
| 3   | 2   | 3   | 3   | 3   | 3   | 2   | 3   | 2   | 3   |
| 3   | 3   | 3   | 3   | 3   | 3   | 3   | 3   | 3   | 3   |
| 3   | 3   | 3   | 3   | 3   | 3   | 3   | 3   | 3   | 3   |
| 3   | 2   | 2   | 2   | 2   | 3   | 3   | 3   | 3   | 3   |
| 3   | 3   | 3   | 3   | 3   | 3   | 3   | 3   | 3   | 3   |
| 1   | 1   | 2   | 2   | 2   | 1   | 1   | 2   | 2   | 2   |

|   |   |   |   |   |   |   |   |   |   |
|---|---|---|---|---|---|---|---|---|---|
| 3 | 3 | 3 | 3 | 3 | 3 | 3 | 3 | 3 | 3 |
| 3 | 3 | 3 | 3 | 3 | 3 | 3 | 3 | 3 | 3 |
| 2 | 1 | 2 | 2 | 2 | 1 | 1 | 2 | 2 | 2 |
